# Supplementary material
Source: Springer Nature journal article supplement (https://www.springermedizin.de/resource/supplementary/13020_2013_207_MOESM3_ESM.pdf/9641206)

bp

1,500  
1,000  
800  
500  
200

DNA ladder marker

- Untreated HepG2 cells

+ CF

+ Melphalan

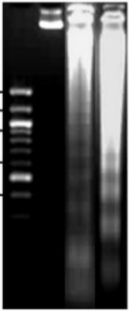

Supplement: MOESM3 [file 9641206]
